# Supplementary material for: Adaptive Protein Evolution in Animals and the Effective Population Size Hypothesis
Source: PubMed Central journal article supplement (PMC4709115; doi:10.1371/journal.pgen.1005774), 2016-01-11

**a**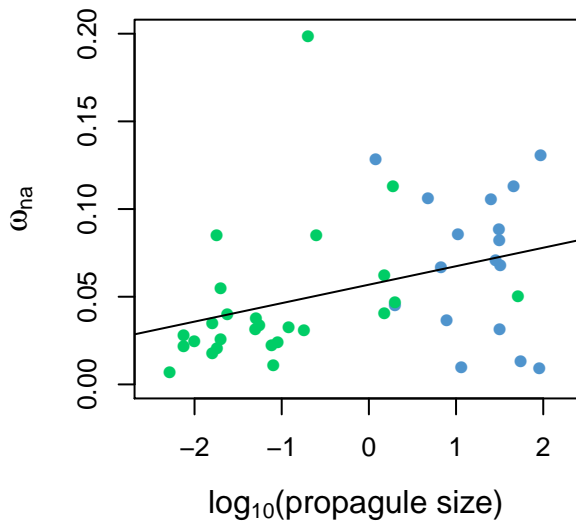**b**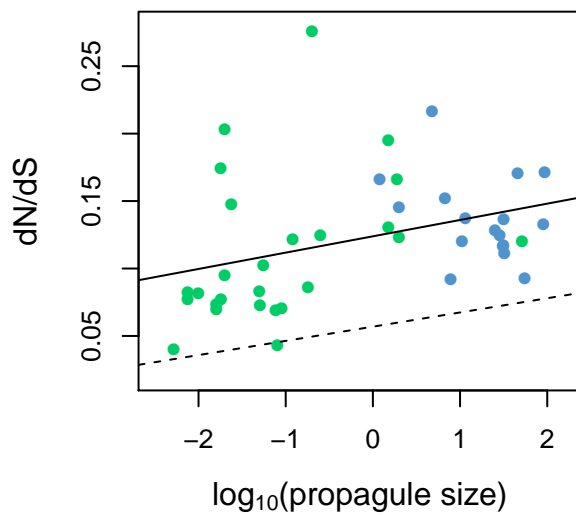**c**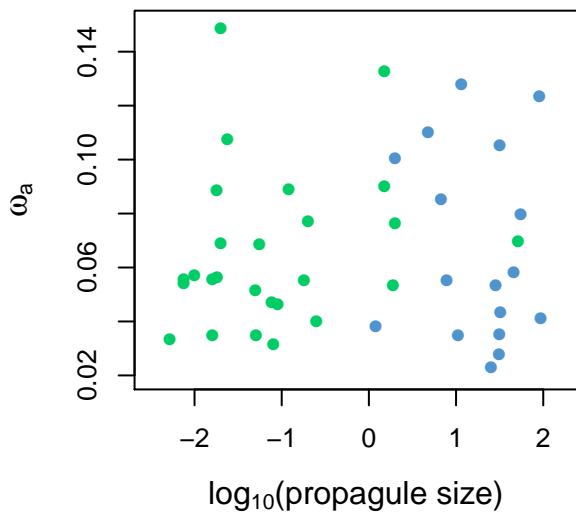**d**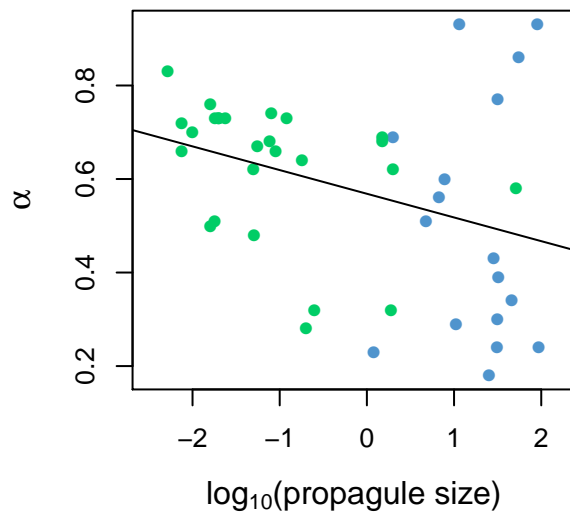

Supplement: pgen.1005774.s004.pdf [file pgen.1005774.s004.pdf]
